# Supplementary material
Source: PubMed Central journal article supplement (PMC8978221)

## Appendix

**Table 1. Severity Fractions for Mental Health and Substance Use Disorders Used in this Study**

| <b>DSM-5 Disorder Groupings</b>                      | <b>Disorder-Specific Definitions (If Subtypes Exist)</b> | <b>Severity Level</b> | <b>Severity Fraction</b> |
|------------------------------------------------------|----------------------------------------------------------|-----------------------|--------------------------|
| Depressive Disorders                                 | Major Depressive Disorder                                | Asymptomatic          | 0.13                     |
|                                                      |                                                          | Mild                  | 0.59                     |
|                                                      |                                                          | Moderate              | 0.17                     |
|                                                      |                                                          | Severe                | 0.10                     |
|                                                      | Dysthymia                                                | Asymptomatic          | 0.29                     |
|                                                      |                                                          | Symptomatic           | 0.71                     |
| Anxiety Disorders                                    | Anxiety Disorders                                        | Asymptomatic          | 0.20                     |
|                                                      |                                                          | Mild                  | 0.50                     |
|                                                      |                                                          | Moderate              | 0.19                     |
|                                                      |                                                          | Severe                | 0.11                     |
| Alcohol Use Disorders                                | Alcohol-Use Disorders                                    | Asymptomatic          | 0.32                     |
|                                                      |                                                          | Very mild             | 0.59                     |
|                                                      |                                                          | Mild                  | 0.038                    |
|                                                      |                                                          | Moderate              | 0.033                    |
|                                                      |                                                          | Severe                | 0.024                    |
| Opioid-Use Disorders                                 | Opioid-Use Disorders                                     | Asymptomatic          | 0.16                     |
|                                                      |                                                          | Mild                  | 0.37                     |
|                                                      |                                                          | Moderate/Severe       | 0.47                     |
| Cannabis-Use Disorders                               | Cannabis-Use Disorders                                   | Asymptomatic          | 0.58                     |
|                                                      |                                                          | Mild                  | 0.36                     |
|                                                      |                                                          | Moderate/Severe       | 0.06                     |
| Schizophrenia Spectrum and Other Psychotic Disorders | Schizophrenia                                            | Acute state           | 0.63                     |
|                                                      |                                                          | Residual state        | 0.37                     |
| Bipolar and Related Disorders                        | Bipolar I and Bipolar II                                 | Manic episode         | 0.23                     |
|                                                      |                                                          | Depressive episode    | 0.27                     |
|                                                      |                                                          | Residual state        | 0.50                     |
| Attention-Deficit/Hyperactivity Disorder             | ADHD                                                     | Asymptomatic          | 0.33                     |
|                                                      |                                                          | Mild                  | 0.36                     |
|                                                      |                                                          | Moderate              | 0.18                     |
|                                                      |                                                          | Severe                | 0.14                     |
| Feeding and Eating                                   | Bulimia Nervosa and Anorexia                             | Asymptomatic/Mild     | 0.71                     |

|                           |                                                       |                   |      |
|---------------------------|-------------------------------------------------------|-------------------|------|
| Disorders                 | Nervosa                                               | Moderate          | 0.15 |
|                           |                                                       | Severe            | 0.14 |
| Intellectual Disabilities | Intellectual Disabilities and Developmental Disorders | Asymptomatic/Mild | 0.85 |
|                           |                                                       | Moderate          | 0.10 |
|                           |                                                       | Severe            | 0.03 |
|                           |                                                       | Profound          | 0.02 |

**Figure 1.** Step 9: Severity-adjusted Number of Cases in British Columbia. Data corresponding to Anxiety Disorders is shown.

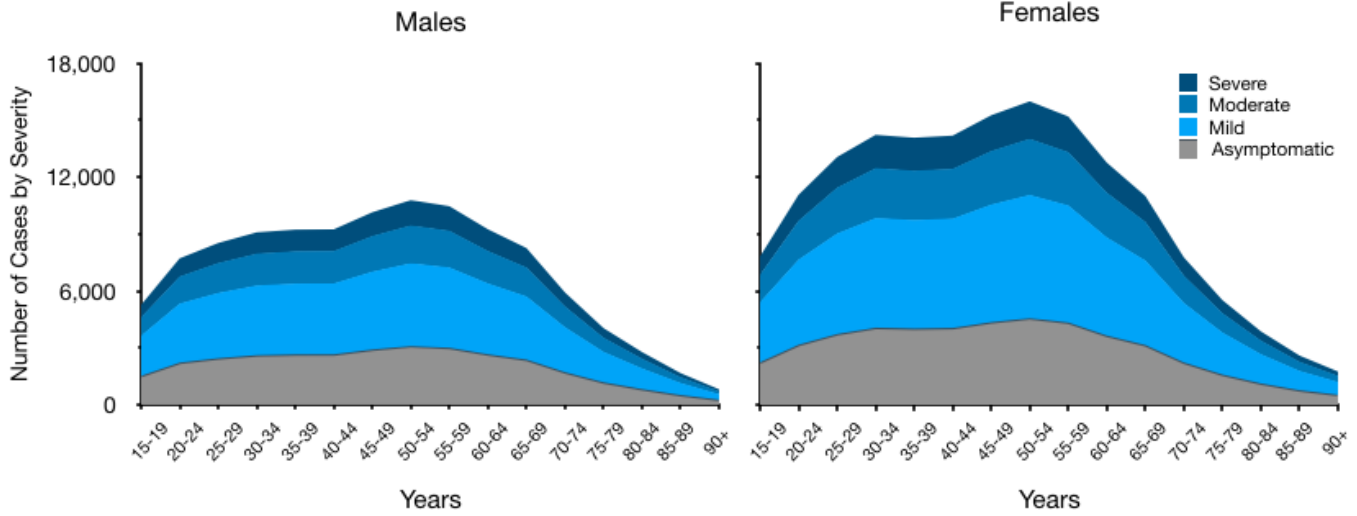

Supplement: sj-pdf-1-cpa-10.1177_07067437211006872.pdf [file sj-pdf-1-cpa-10.1177_07067437211006872.pdf]
